# Supplementary material for: FuncTree: Functional Analysis and Visualization for Large-Scale Omics Data
Source: PLoS One. 2015 May 14;10(5):e0126967. doi: 10.1371/journal.pone.0126967 (PMC4431737; doi:10.1371/journal.pone.0126967)
Supplement: S1 Table — (XLSX) [file pone.0126967.s001.xlsx]

## Sheet: Escherichia
NODE	DESCRIPTION	MAPPED_VALUE	P_VALUE	COVERAGE
map00540	Lipopolysaccharide biosynthesis	300	9.46252e-37	0.857143
map04122	Sulfur relay system	265.312	1.85043e-34	0.809524
map02040	Flagellar assembly	237.874	1.30659e-28	0.878049
map00970	Aminoacyl-tRNA biosynthesis	229.045	4.35225e-31	0.776471
map02060	Phosphotransferase system (PTS)	221.453	1.45347e-33	0.694118
map00052	Galactose metabolism	205.454	1.20839e-38	0.557692
map00240	Pyrimidine metabolism	194.003	3.23045e-38	0.532609
map00750	Vitamin B6 metabolism	182.36	2.89071e-38	0.5
map00051	Fructose and mannose metabolism	178.799	2.16787e-34	0.546667
map00550	Peptidoglycan biosynthesis	173.01	2.43078e-36	0.5
map00053	Ascorbate and aldarate metabolism	154.578	5.26346e-36	0.45098
map00910	Nitrogen metabolism	149.609	5.14758e-36	0.436364
map01053	Biosynthesis of siderophore group nonribosomal peptides	148.646	4.6226e-41	0.37931
map00040	Pentose and glucuronate interconversions	148.622	1.37947e-33	0.465517
map00230	Purine metabolism	146.429	7.46603e-37	0.417178
map00130	Ubiquinone and other terpenoid-quinone biosynthesis	140.905	8.735e-33	0.452381
map00640	Propanoate metabolism	139.41	8.14475e-32	0.461538
map03440	Homologous recombination	135.89	5.95172e-36	0.397059
map02020	Two-component system	111.89	7.59093e-33	0.358543
map00500	Starch and sucrose metabolism	104.339	3.78314e-32	0.341772
NODE	DESCRIPTION	MAPPED_VALUE	P_VALUE	COVERAGE
M00217	D-Allose transport system	300	6.29255e-255	1
M00488	DcuS-DcuR (C4-dicarboxylate metabolism) two-component regulatory system	219.881	4.86014e-187	1
M00455	TorS-TorR (TMAO respiration) two-component regulatory system	218.303	1.05682e-185	1
M00192	Putative thiamine transport system	212.979	3.4243e-181	1
M00306	PTS system, fructose-specific II-like component	204.031	1.31012e-173	1
M00499	HydH-HydG (metal tolerance) two-component regulatory system	196.866	1.54346e-167	1
M00486	CitA-CitB (citrate fermentation) two-component regulatory system	194.364	2.03455e-165	1
M00477	EvgS-EvgA (acid and drug tolerance) two-component regulatory system	170.983	1.31632e-145	1
M00278	PTS system, sorbose-specific II component	166.777	4.82393e-142	1
M00287	PTS system, galactosamine-specific II component	153.858	4.26718e-131	1
M00473	UhpB-UhpA (hexose phosphates uptake) two-component regulatory system	109.654	1.21893e-93	1
M00363	EHEC pathogenicity signature, Shiga toxin	108.604	9.45315e-93	1
M00226	Histidine transport system	95.8426	6.15134e-82	1
M00550	Ascorbate degradation, ascorbate => D-xylulose-5P	50.5651	1.42675e-43	1
M00331	Type II general secretion system	46.2599	6.34241e-40	1
M00124	Pyridoxal biosynthesis, erythrose-4P => pyridoxal-5P	44.2598	3.14079e-38	1
M00530	Dissimilatory nitrate reduction, nitrate => ammonia	42.5751	8.24437e-41	0.9
M00320	Lipopolysaccharide export system	42.3819	1.22527e-36	1
M00080	Lipopolysaccharide biosynthesis, inner core => outer core => O-antigen	42.3234	7.54354e-40	0.916667
M00123	Biotin biosynthesis, pimeloyl-ACP/CoA => biotin	41.6179	5.43983e-36	1
NODE	DESCRIPTION	MAPPED_VALUE	P_VALUE	COVERAGE
K16324	putative pseudouridine transporter	300	2.2250738585072014e-308	1
K16138	TetR/AcrR family transcriptional regulator, repressor for uid operon	300	2.2250738585072014e-308	1
K08326	aminopeptidase [EC:3.4.11.-]	300	2.2250738585072014e-308	1
K16139	glucuronide carrier protein	300	2.2250738585072014e-308	1
K03275	UDP-glucose:(glucosyl)LPS alpha-1,3-glucosyltransferase [EC:2.4.1.-]	300	2.2250738585072014e-308	1
K16325	nucleoside permease	300	2.2250738585072014e-308	1
K10973	IclR family transcriptional regulator, negative regulator of allantoin and glyoxylate utilization operons	300	2.2250738585072014e-308	1
K10975	allantoin permease	300	2.2250738585072014e-308	1
K11139	hemolysin E	300	2.2250738585072014e-308	1
K16326	CRP/FNR family transcriptional regulator, putaive post-exponential-phase nitrogen-starvation regulator	300	2.2250738585072014e-308	1
K02173	hypothetical protein	300	2.2250738585072014e-308	1
K12529	putative selenate reductase FAD-binding subunit	300	2.2250738585072014e-308	1
K12528	putative selenate reductase molybdopterin-binding subunit	300	2.2250738585072014e-308	1
K05887	quinate/shikimate dehydrogenase [EC:1.1.1.282]	300	2.2250738585072014e-308	1
K07591	threonine dehydratase operon activator protein	300	2.2250738585072014e-308	1
K16346	xanthine permease XanQ	300	2.2250738585072014e-308	1
K07797	multidrug resistance protein K	300	2.2250738585072014e-308	1
K07471	probable transcriptional regulator	300	2.2250738585072014e-308	1
K07356	fimbrial protein	300	2.2250738585072014e-308	1
K15550	multidrug resistance outer membrane protein MdtP	300	2.2250738585072014e-308	1

## Sheet: Mycobacterium
NODE	DESCRIPTION	MAPPED_VALUE	P_VALUE	COVERAGE
map00984	Steroid degradation	300	1.78267e-41	0.857143
map00903	Limonene and pinene degradation	63.8186	7.63472e-15	0.526316
map00281	Geraniol degradation	48.2337	2.30161e-14	0.411765
map04122	Sulfur relay system	45.0535	5.76471e-13	0.428571
map00900	Terpenoid backbone biosynthesis	36.0909	1.48983e-13	0.327586
map01053	Biosynthesis of siderophore group nonribosomal peptides	35.1918	6.27826e-14	0.310345
NODE	DESCRIPTION	MAPPED_VALUE	P_VALUE	COVERAGE
M00482	DevS-DevR (redox response) two-component regulatory system	300	8.39828e-275	1
M00463	TrcS-TrcR two-component regulatory system	279.944	1.7676e-256	1
M00462	PrrB-PrrA (intracellular multiplication) two-component regulatory system	183.507	2.23955e-168	1
M00224	Fluoroquinolones transport system	171.803	1.10497e-157	1
M00342	Bacterial proteasome	33.4707	2.64027e-31	1
M00615	Nitrate assimilation	19.833	7.59987e-19	1
M00365	C10-C20 isoprenoid biosynthesis, archaea	16.4561	9.24619e-16	1
M00210	Putative ABC transport system	16.2039	1.57148e-15	1
M00554	Nucleotide sugar biosynthesis, galactose => UDP-galactose	11.7851	1.71103e-11	1
M00096	C5 isoprenoid biosynthesis, non-mevalonate pathway	10.33	2.41559e-11	0.888889
NODE	DESCRIPTION	MAPPED_VALUE	P_VALUE	COVERAGE
K12951	cation-transporting P-type ATPase D [EC:3.6.3.-]	300	2.2250738585072014e-308	1
K07682	two-component system, NarL family, sensor histidine kinase DevS [EC:2.7.13.3]	300	2.2250738585072014e-308	1
K12445	trans enoyl reductase [EC:1.3.1.-]	300	2.2250738585072014e-308	1
K12430	polyketide synthase 1/15	300	2.2250738585072014e-308	1
K12953	cation-transporting ATPase F [EC:3.6.3.-]	277.21	5.23814e-285	1
K12435	polyketide synthase 8	271.638	2.71214e-279	1
K17484	cyclo(L-tyrosyl-L-tyrosyl) synthase [EC:2.3.2.21]	269.362	5.84823e-277	1
K17483	mycocyclosin synthase [EC:1.14.21.9]	269.362	5.84823e-277	1
K07695	two-component system, NarL family, response regulator DevR	265.391	6.91077e-273	1
K12427	fatty acid CoA ligase FadD28	253.089	2.85155e-260	1
K07672	two-component system, OmpR family, response regulator TrcR	249.4	1.73113e-256	1
K12949	cation-transporting P-type ATPase A/B [EC:3.6.3.-]	248.622	1.08695e-255	1
K12426	long chain fatty acid CoA FadD26	247.374	2.06918e-254	1
K12956	cation-transporting ATPase V [EC:3.6.3.-]	246.557	1.42354e-253	1
K12440	phenolpthiocerol synthesis type-I polyketide synthase A	246.557	1.42354e-253	1
K12444	phenolpthiocerol synthesis type-I polyketide synthase E	242.275	3.50903e-249	1
K12952	cation-transporting ATPase E [EC:3.6.3.-]	235.313	4.83138e-242	1
K12441	phenolpthiocerol synthesis type-I polyketide synthase B	225.026	1.71341e-231	1
K00622	arylamine N-acetyltransferase [EC:2.3.1.5]	222.466	7.23469e-229	1
K00545	catechol O-methyltransferase [EC:2.1.1.6]	218.637	6.10506e-225	1

## Sheet: Streptomyces
NODE	DESCRIPTION	MAPPED_VALUE	P_VALUE	COVERAGE
map00331	Clavulanic acid biosynthesis	300	7.4855e-42	0.8
map00984	Steroid degradation	85.6273	5.08404e-27	0.357143
map00780	Biotin metabolism	47.8261	1.35662e-08	0.666667
map00791	Atrazine degradation	44.6543	3.74325e-12	0.428571
map00020	Citrate cycle (TCA cycle)	43.6007	2.73354e-10	0.5
map00250	Alanine, aspartate and glutamate metabolism	43.3507	6.14005e-09	0.578947
map00670	One carbon pool by folate	43.2844	7.46775e-11	0.46875
map00300	Lysine biosynthesis	41.5388	3.15145e-10	0.479452
map00770	Pantothenate and CoA biosynthesis	41.207	1.61646e-10	0.461538
map00260	Glycine, serine and threonine metabolism	40.8861	5.40454e-09	0.542373
map00010	Glycolysis / Gluconeogenesis	39.9317	1.05932e-10	0.439024
map00311	Penicillin and cephalosporin biosynthesis	39.3191	3.37149e-11	0.411765
map00900	Terpenoid backbone biosynthesis	39.0839	1.1372e-10	0.431034
map00511	Other glycan degradation	38.4191	3.3106e-10	0.444444
map03410	Base excision repair	38.0551	5.07535e-11	0.405405
map00360	Phenylalanine metabolism	35.1039	3.69063e-09	0.456522
map00930	Caprolactam degradation	34.861	1.2003e-09	0.428571
map00520	Amino sugar and nucleotide sugar metabolism	34.2115	2.5807e-10	0.391304
map00650	Butanoate metabolism	34.1736	8.98045e-09	0.465753
map00500	Starch and sucrose metabolism	34.1255	1.39554e-10	0.379747
NODE	DESCRIPTION	MAPPED_VALUE	P_VALUE	COVERAGE
M00619	Xylobiose transport system	300	1.09181e-211	1
M00205	N-Acetylglucosamine transport system	190.791	6.8363e-135	1
M00233	Glutamate transport system	82.3726	1.1887e-58	1
M00460	MprB-MprA (maintenance of persistent infection) two-component regulatory system	69.3164	1.80411e-49	1
M00461	MtrB-MtrA (osmotic stress response) two-component regulatory system	63.6818	1.65409e-45	1
M00220	Rhamnose transport system	52.4307	1.35026e-37	1
M00479	DesK-DesR (membrane lipid fluidity regulation) two-component regulatory system	37.3436	5.49204e-27	1
M00342	Bacterial proteasome	35.6581	8.41403e-26	1
M00215	D-Xylose transport system	30.8315	2.08483e-22	1
M00033	Ectoine biosynthesis, aspartate => ectoine	18.6836	7.27098e-14	1
M00302	2-Aminoethylphosphonate transport system	18.1734	1.66106e-13	1
M00365	C10-C20 isoprenoid biosynthesis, archaea	17.1364	8.90374e-13	1
M00606	N,N'-Diacetylchitobiose transport system	15.4974	1.26504e-11	1
M00149	Succinate dehydrogenase, prokaryotes	14.7822	4.028e-11	1
M00206	Cellobiose transport system	14.5928	5.47306e-11	1
M00209	Osmoprotectant transport system	13.4114	3.70704e-10	1
M00254	ABC-2 type transport system	13.3599	4.02909e-10	1
M00178	Ribosome, bacteria	11.9694	1.84245e-09	0.963636
M00050	Guanine ribonucleotide biosynthesis IMP => GDP,GTP	11.7868	1.13177e-10	0.833333
M00201	alpha-Glucoside transport system	11.1246	1.66476e-10	0.8
NODE	DESCRIPTION	MAPPED_VALUE	P_VALUE	COVERAGE
K17641	beta-xylosidase	300	1.81316e-298	1
K17640	LacI family transcriptional regulator, xylobiose transport system transcriptional regulator	275.741	2.16077e-274	1
K17326	xylobiose transport system substrate-binding protein	227.205	3.20184e-226	1
K17327	xylobiose transport system permease protein	227.205	3.20184e-226	1
K10187	germacradienol/geosmin synthase [EC:4.2.3.22 4.2.3.75 4.1.99.16]	213.486	1.32174e-212	1
K17328	xylobiose transport system permease protein	211.724	7.40368e-211	1
K16014	ATP-binding cassette, subfamily C, bacterial CydCD	208.521	1.11816e-207	1
K13063	phenazine biosynthesis protein phzE [EC:2.6.1.86]	200.159	2.22573e-199	1
K17329	N,N'-diacetylchitobiose transport system substrate-binding protein	199.862	4.38972e-199	1
K17330	N,N'-diacetylchitobiose transport system permease protein	195.144	2.11217e-194	1
K00271	valine dehydrogenase (NAD+) [EC:1.4.1.23]	192.948	3.19252e-192	1
K14672	putative polyketide hydroxylase	170.747	3.45366e-170	1
K17331	N,N'-diacetylchitobiose transport system permease protein	169.654	4.19917e-169	1
K10201	N-acetylglucosamine transport system permease protein	141.868	1.58438e-141	1
K10202	N-acetylglucosamine transport system permease protein	139.816	1.72496e-139	1
K10200	N-acetylglucosamine transport system substrate-binding protein	139.705	2.22408e-139	1
K14671	cyclase	139.17	7.55236e-139	1
K14669	minimal PKS acyl carrier protein	133.774	1.7092e-133	1
K02803	PTS system, N-acetylglucosamine-specific IIB component [EC:2.7.1.69]	131.211	5.98255e-131	1
K14673	putative monooxygenase	128.18	6.09525e-128	1
