# Supplementary material for: FuncTree: Functional Analysis and Visualization for Large-Scale Omics Data
Source: PLoS One. 2015 May 14;10(5):e0126967. doi: 10.1371/journal.pone.0126967 (PMC4431737; doi:10.1371/journal.pone.0126967)
Supplement: S2 Table — (XLSX) [file pone.0126967.s002.xlsx]

## Sheet: Variance
NODE	DESCRIPTION	STARNDARD_DEVIATION
map00511	Other glycan degradation	0.000167789
map00531	Glycosaminoglycan degradation	8.95717e-05
map02030	Bacterial chemotaxis	7.25196e-05
map00785	Lipoic acid metabolism	5.53955e-05
map00780	Biotin metabolism	5.51683e-05
map00600	Sphingolipid metabolism	5.02373e-05
map00473	D-Alanine metabolism	4.91816e-05
map00970	Aminoacyl-tRNA biosynthesis	4.86212e-05
map00290	Valine, leucine and isoleucine biosynthesis	4.85591e-05
map02040	Flagellar assembly	4.71453e-05
map03010	Ribosome	4.64455e-05
map00521	Streptomycin biosynthesis	4.41146e-05
map00052	Galactose metabolism	4.20545e-05
map00363	Bisphenol degradation	3.88962e-05
map00540	Lipopolysaccharide biosynthesis	3.86869e-05
map00040	Pentose and glucuronate interconversions	3.82586e-05
map04112	Cell cycle - Caulobacter	3.36527e-05
map00550	Peptidoglycan biosynthesis	3.27291e-05
map00460	Cyanoamino acid metabolism	3.15276e-05
map00051	Fructose and mannose metabolism	3.06936e-05
NODE	DESCRIPTION	STARNDARD_DEVIATION
M00258	Putative ABC transport system	0.0005786
M00207	Putative multiple sugar transport system	0.000527571
M00519	YesM-YesN two-component regulatory system	0.000486801
M00254	ABC-2 type transport system	0.000358975
M00081	Pectin degradation	0.000354873
M00239	Peptides/nickel transport system	0.000339461
M00236	Putative polar amino acid transport system	0.000286183
M00079	Keratan sulfate degradation	0.000238729
M00245	Cobalt/nickel transport system	0.000232854
M00212	Ribose transport system	0.00022881
M00221	Putative simple sugar transport system	0.000222775
M00458	ResE-ResD (aerobic and anaerobic respiration) two-component regulatory system	0.000196866
M00495	AgrC-AgrA (exoprotein synthesis) two-component regulatory system	0.000158906
M00188	NitT/TauT family transport system	0.000157998
M00499	HydH-HydG (metal tolerance) two-component regulatory system	0.000156482
M00246	Nickel transport system	0.000155713
M00240	Iron complex transport system	0.000152258
M00247	Putative ABC transport system	0.000151176
M00086	beta-Oxidation, acyl-CoA synthesis	0.000148091
M00492	LytS-LytR two-component regulatory system	0.000145957
NODE	DESCRIPTION	STARNDARD_DEVIATION
K07233	copper resistance protein B	0.00758651
K07114	Ca-activated chloride channel homolog	0.0057601
K00936	null	0.00284994
K03088	RNA polymerase sigma-70 factor, ECF subfamily	0.00268871
K02014	iron complex outermembrane recepter protein	0.00205441
K07133	null	0.00203865
K07165	transmembrane sensor	0.00184954
K03350	anaphase-promoting complex subunit 3	0.00174443
K07495	putative transposase	0.00169845
K07484	transposase	0.00161654
K00754	null	0.00155728
K06400	site-specific DNA recombinase	0.00153895
K06147	ATP-binding cassette, subfamily B, bacterial	0.00138576
K01190	beta-galactosidase [EC:3.2.1.23]	0.00124696
K04763	integrase/recombinase XerD	0.00123645
K07482	transposase, IS30 family	0.00121742
K03296	hydrophobic/amphiphilic exporter-1 (mainly G- bacteria), HAE1 family	0.00114196
K01238	null	0.00112451
K06921	null	0.00110801
K07481	transposase, IS5 family	0.00108957

## Sheet: Enrichment
NODE	DESCRIPTION	P_VALUE	MAPPED_VALUE
map02040	Flagellar assembly	9.67664e-09	18.4536
map02030	Bacterial chemotaxis	6.20231e-07	14.2932
map02020	Two-component system	4.95533e-06	12.215
map00680	Methane metabolism	6.6703e-05	9.61526
map00531	Glycosaminoglycan degradation	0.000591299	7.43319
map00040	Pentose and glucuronate interconversions	0.000748145	7.19791
map00340	Histidine metabolism	0.00804188	4.82309
map00051	Fructose and mannose metabolism	0.00948947	4.65757
map00440	Phosphonate and phosphinate metabolism	0.0111401	4.49721
map00511	Other glycan degradation	0.0154902	4.16755
map00312	beta-Lactam resistance	0.0234184	3.75423
map00520	Amino sugar and nucleotide sugar metabolism	0.0385037	3.257
map05130	Pathogenic Escherichia coli infection	0.0460831	3.07731
map00500	Starch and sucrose metabolism	0.0549415	2.90149
map00196	Photosynthesis - antenna proteins	0.0598857	2.81532
map00140	Steroid hormone biosynthesis	0.063337	2.75929
map00052	Galactose metabolism	0.0698864	2.66088
map00311	Penicillin and cephalosporin biosynthesis	0.11888	2.12964
map00720	Carbon fixation pathways in prokaryotes	0.119019	2.12847
map00053	Ascorbate and aldarate metabolism	0.124091	2.08674
map00860	Porphyrin and chlorophyll metabolism	0.128651	2.05065
NODE	DESCRIPTION	P_VALUE	MAPPED_VALUE
M00332	Type III secretion system	1.93292e-06	13.1565
M00567	Methanogenesis, CO2 => methane	7.54979e-05	9.49141
M00357	Methanogenesis, acetate => methane	0.000139065	8.88057
M00542	EHEC/EPEC pathogenicity signature, T3SS and effectors	0.000211925	8.45928
M00356	Methanogenesis, methanol => methane	0.000546339	7.51227
M00563	Methanogenesis, methylamine/dimethylamine/trimethylamine => methane	0.000546339	7.51227
M00159	V-type ATPase, prokaryotes	0.000546339	7.51227
M00122	Cobalamin biosynthesis, cobinamide => cobalamin	0.000546339	7.51227
M00506	CheA-CheYBV (chemotaxis) two-component regulatory system	0.00915564	4.69338
M00506	CheA-CheYBV (chemotaxis) two-component regulatory system	0.00915564	4.69338
M00061	Uronic acid metabolism	0.00915564	4.69338
M00596	Dissimilatory sulfate reduction, sulfate => H2S	0.0166598	4.09476
M00078	Heparan sulfate degradation	0.0166598	4.09476
M00076	Dermatan sulfate degradation	0.0234184	3.75423
M00310	Pyruvate:ferredoxin oxidoreductase	0.0234184	3.75423
M00541	Benzoyl-CoA degradation, benzoyl-CoA => 3-hydroxypimeloyl-CoA	0.0234184	3.75423
M00311	2-oxoglutarate:ferredoxin oxidoreductase	0.0234184	3.75423
M00077	Chondroitin sulfate degradation	0.0234184	3.75423
M00173	Reductive citrate cycle (Arnon-Buchanan cycle)	0.0326681	3.42136
M00361	Nucleotide sugar biosynthesis, eukaryotes	0.0370407	3.29574
M00345	Formaldehyde assimilation, ribulose monophosphate pathway	0.0370407	3.29574
NODE	DESCRIPTION	P_VALUE	MAPPED_VALUE
K13993	HSP20 family protein	2.28972e-259	595.541
K04113	benzoyl-CoA reductase subunit B [EC:1.3.7.8]	2.29751e-259	595.538
K11176	IMP cyclohydrolase [EC:3.5.4.10]	8.85099e-259	594.189
K06421	small acid-soluble spore protein D (minor alpha/beta-type SASP)	1.6417e-258	593.571
K06348	sporulation inhibitor KapD	2.33083e-258	593.221
K08587	clostripain [EC:3.4.22.8]	3.66055e-258	592.769
K14138	acetyl-CoA synthase [EC:2.3.1.169]	9.37551e-258	591.829
K07162		1.629e-257	591.276
K06395	stage III sporulation protein AF	1.72622e-257	591.218
K04940	opine dehydrogenase [EC:1.5.1.28]	1.77315e-257	591.192
K08222	MFS transporter, YQGE family, putative transporter	2.35717e-257	590.907
K11640	two-component system, LytT family, sensor histidine kinase NatK [EC:2.7.13.3]	2.68353e-257	590.777
K06331	spore coat protein I	4.6855e-257	590.22
K06404	stage V sporulation protein AB	6.03718e-257	589.966
K12529	putative selenate reductase FAD-binding subunit	1.19721e-256	589.282
K06396	stage III sporulation protein AG	1.50479e-256	589.053
K12547	polysaccharidase protein	2.54642e-256	588.527
K06403	stage V sporulation protein AA	2.93661e-256	588.385
K10708	fructoselysine 6-phosphate deglycase [EC:3.5.-.-]	6.71081e-256	587.558
K00062	D-arabinose 1-dehydrogenase [EC:1.1.1.116]	8.36413e-256	587.338
K08174	MFS transporter, FHS family, glucose/mannose:H+ symporter	1.74128e-255	586.605
