# Supplementary material for: FuncTree: Functional Analysis and Visualization for Large-Scale Omics Data
Source: PLoS One. 2015 May 14;10(5):e0126967. doi: 10.1371/journal.pone.0126967 (PMC4431737; doi:10.1371/journal.pone.0126967)
Supplement: S3 Table — (XLSX) [file pone.0126967.s003.xlsx]

## Sheet: Alt-activated macrophage
NODE	DESCRIPTION	P_VALUE	MAPPED_VALUE
map04142	Lysosome	6.16808e-24	53.4427
map05150	Staphylococcus aureus infection	3.67078e-16	35.541
map04380	Osteoclast differentiation	8.99247e-16	34.645
map05152	Tuberculosis	1.43581e-14	31.8745
map04145	Phagosome	1.70514e-12	27.0974
map05323	Rheumatoid arthritis	3.50823e-11	24.0733
map00531	Glycosaminoglycan degradation	1.7787e-10	22.45
map05140	Leishmaniasis	1.05584e-08	18.3663
map04672	Intestinal immune network for IgA production	1.38016e-06	13.4933
map05322	Systemic lupus erythematosus	2.21341e-06	13.021
map04640	Hematopoietic cell lineage	3.08722e-06	12.6882
map05133	Pertussis	1.81438e-05	10.9172
map05310	Asthma	3.17338e-05	10.3581
map00511	Other glycan degradation	6.10954e-05	9.70307
map05330	Allograft rejection	7.46875e-05	9.5022
map04514	Cell adhesion molecules (CAMs)	0.000149285	8.80965
map04062	Chemokine signaling pathway	0.000157994	8.75295
map04966	Collecting duct acid secretion	0.000214977	8.44498
map05320	Autoimmune thyroid disease	0.000304856	8.09567
map05202	Transcriptional misregulation in cancer	0.000403377	7.81564
map05416	Viral myocarditis	0.00044587	7.71548
NODE	DESCRIPTION	P_VALUE	MAPPED_VALUE
M00160	V-type ATPase, eukaryotes	9.22766e-06	11.5933
M00079	Keratan sulfate degradation	5.26841e-05	9.8512
M00038	Tryptophan metabolism, tryptophan => kynurenine => 2-aminomuconate	0.00421457	5.46921
M00077	Chondroitin sulfate degradation	0.00421457	5.46921
M00078	Heparan sulfate degradation	0.00511741	5.27511
M00076	Dermatan sulfate degradation	0.00511741	5.27511
M00104	Bile acid biosynthesis, cholesterol => cholate	0.00830197	4.79126
M00103	Cholecalciferol biosynthesis	0.0295618	3.52127
M00344	Formaldehyde assimilation, xylulose monophosphate pathway	0.0392208	3.23855
NODE	DESCRIPTION	P_VALUE	MAPPED_VALUE
K06512	leukocyte immunoglobulin-like receptor	1.04478e-08	18.3769
K12373	hexosaminidase [EC:3.2.1.52]	0.000584608	7.44457
K01158	deoxyribonuclease II [EC:3.1.22.1]	0.000584608	7.44457
K06752	major histocompatibility complex, class II	0.0008405	7.08151
K07983	Fc receptor, IgE, high affinity I, gamma polypeptide	0.0198059	3.92177
K01189	alpha-galactosidase [EC:3.2.1.22]	0.0198059	3.92177
K14851	ribosomal RNA-processing protein 17	0.0198059	3.92177
K01639	N-acetylneuraminate lyase [EC:4.1.3.3]	0.0198059	3.92177
K01787	N-acylglucosamine 2-epimerase [EC:5.1.3.8]	0.0198059	3.92177
K14717	solute carrier family 39 (zinc transporter), member 11	0.0198059	3.92177
K14708	solute carrier family 26 (sodium-independent sulfate anion transporter), member 11	0.0198059	3.92177
K14352	solute carrier organic anion transporter family, member 2B	0.0198059	3.92177
K13704	abhydrolase domain-containing protein 12 [EC:3.1.1.23]	0.0198059	3.92177
K02151	V-type H+-transporting ATPase subunit F [EC:3.6.3.14]	0.0198059	3.92177
K03662	V-type H+-transporting ATPase S1 subunit [EC:3.6.3.14]	0.0198059	3.92177
K13102	DNA/RNA-binding protein KIN17	0.0198059	3.92177
K07438	25-hydroxyvitamin D3 1alpha-hydroxylase [EC:1.14.13.13]	0.0198059	3.92177
K12360	ceroid-lipofuscinosis neuronal protein 8	0.0198059	3.92177
K00488	cholestanetriol 26-monooxygenase [EC:1.14.13.15]	0.0198059	3.92177
K12408	cholest-5-ene-3beta,7alpha-diol 3beta-dehydrogenase [EC:1.1.1.181]	0.0198059	3.92177
K06129	lysophospholipase III [EC:3.1.1.5]	0.0198059	3.92177

## Sheet: Epithelial cell of SI
NODE	DESCRIPTION	P_VALUE	MAPPED_VALUE
map04975	Fat digestion and absorption	7.41909e-13	27.9295
map05204	Chemical carcinogenesis	2.95371e-12	26.548
map04976	Bile secretion	4.86222e-10	21.4444
map04974	Protein digestion and absorption	7.46895e-10	21.0151
map00980	Metabolism of xenobiotics by cytochrome P450	9.41299e-09	18.4812
map00590	Arachidonic acid metabolism	1.84557e-08	17.8079
map00830	Retinol metabolism	1.84557e-08	17.8079
map04977	Vitamin digestion and absorption	6.13039e-08	16.6074
map03320	PPAR signaling pathway	2.39425e-07	15.245
map00982	Drug metabolism - cytochrome P450	2.73473e-07	15.1121
map04978	Mineral absorption	8.24443e-07	14.0086
map00140	Steroid hormone biosynthesis	2.93375e-06	12.7392
map04973	Carbohydrate digestion and absorption	4.03835e-06	12.4197
map00040	Pentose and glucuronate interconversions	6.16482e-06	11.9967
map00983	Drug metabolism - other enzymes	7.32605e-06	11.8241
map04950	Maturity onset diabetes of the young	2.14472e-05	10.7499
map04972	Pancreatic secretion	2.77948e-05	10.4907
map00591	Linoleic acid metabolism	4.43552e-05	10.0233
map00500	Starch and sucrose metabolism	0.000224757	8.40049
map00592	alpha-Linolenic acid metabolism	0.000224757	8.40049
map00601	Glycosphingolipid biosynthesis - lacto and neolacto series	0.000263856	8.24011
NODE	DESCRIPTION	P_VALUE	MAPPED_VALUE
M00003	Gluconeogenesis, oxaloacetate => fructose-6P	0.000577525	7.45676
M00129	Ascorbate biosynthesis, animals, glucose-1P => ascorbate	0.0017802	6.33103
M00067	Cerebroside and sulfatide biosynthesis	0.00207162	6.17942
M00107	Steroid hormone biosynthesis, cholesterol => prognenolone => progesterone	0.00340963	5.68115
M00344	Formaldehyde assimilation, xylulose monophosphate pathway	0.00340963	5.68115
M00110	C19/C18-Steroid hormone biosynthesis, pregnenolone => androstenedione => estrone	0.00505075	5.28822
M00029	Urea cycle	0.00919524	4.68907
M00126	Tetrahydrofolate biosynthesis, GTP => THF	0.0144143	4.23954
M00167	Reductive pentose phosphate cycle, glyceraldehyde-3P => ribulose-5P	0.0173998	4.0513
M00056	O-glycan biosynthesis, mucin type core	0.0185001	3.98998
M00165	Reductive pentose phosphate cycle (Calvin cycle)	0.0277381	3.58495
M00180	RNA polymerase II, eukaryotes	0.0356859	3.333
M00340	Proteasome, 20S core particle	0.0399492	3.22015
M00337	Immunoproteasome	0.0490116	3.0157
NODE	DESCRIPTION	P_VALUE	MAPPED_VALUE
K06087	claudin	1.15133e-05	11.372
K01014	aryl sulfotransferase [EC:2.8.2.1]	0.000219817	8.42271
K00699	glucuronosyltransferase [EC:2.4.1.17]	0.000829358	7.09486
K04257	olfactory receptor	0.00160016	6.43765
K00070	3beta-hydroxy-delta5-steroid dehydrogenase / steroid delta-isomerase [EC:1.1.1.145 5.3.3.1]	0.00207162	6.17942
K01596	phosphoenolpyruvate carboxykinase (GTP) [EC:4.1.1.32]	0.00207162	6.17942
K01128		0.00207162	6.17942
K01047	secretory phospholipase A2 [EC:3.1.1.4]	0.00207182	6.17933
K06499	carcinoembryonic antigen-related cell adhesion molecule	0.00207182	6.17933
K11536	pyrimidine nucleoside transport protein	0.00340963	5.68115
K17277	epidermal growth factor receptor kinase substrate 8	0.00505075	5.28822
K01077	alkaline phosphatase [EC:3.1.3.1]	0.00505075	5.28822
K00485	dimethylaniline monooxygenase (N-oxide forming) [EC:1.14.13.8]	0.00698313	4.96426
K05230	defensin, alpha	0.00919524	4.68907
K06712	butyrophilin	0.0206222	3.88139
K12016	tripartite motif-containing protein 40	0.0373107	3.28847
K01082	3'(2'), 5'-bisphosphate nucleotidase [EC:3.1.3.7]	0.0373107	3.28847
K02129	F-type H+-transporting ATPase subunit e [EC:3.6.3.14]	0.0373107	3.28847
K00071	corticosteroid 11-beta-dehydrogenase isozyme 2 [EC:1.1.1.-]	0.0373107	3.28847
K13368	17beta-estradiol 17-dehydrogenase / 3alpha(17beta)-hydroxysteroid dehydrogenase (NAD+) [EC:1.1.1.62 1.1.1.239]	0.0373107	3.28847
K17690	cytochrome P450, family 3, subfamily A, polypeptide 5 [EC:1.14.14.1]	0.0373107	3.28847
