# Supplementary material for: FuncTree: Functional Analysis and Visualization for Large-Scale Omics Data
Source: PLoS One. 2015 May 14;10(5):e0126967. doi: 10.1371/journal.pone.0126967 (PMC4431737; doi:10.1371/journal.pone.0126967)
Supplement: S4 Table — (XLSX) [file pone.0126967.s004.xlsx]

## Sheet: Alt-activated macrophage 
hsa:805
hsa:5538
hsa:7305
hsa:3074
hsa:54
hsa:64747
hsa:4069
hsa:2896
hsa:822
hsa:7941
hsa:4688
hsa:10457
hsa:1520
hsa:3109
hsa:4048
hsa:427
hsa:9296
hsa:526
hsa:2207
hsa:84191
hsa:5687
hsa:2517
hsa:341
hsa:3108
hsa:4478
hsa:537
hsa:51567
hsa:10327
hsa:11342
hsa:2203
hsa:23646
hsa:2990
hsa:2717
hsa:1593
hsa:2268
hsa:9056
hsa:348
hsa:10261
hsa:27299
hsa:1116
hsa:3684
hsa:10184
hsa:1509
hsa:929
hsa:145389
hsa:728
hsa:51324
hsa:6039
hsa:9709
hsa:4074
hsa:342
hsa:51296
hsa:57600
hsa:3128
hsa:5341
hsa:211
hsa:284129
hsa:4542
hsa:58191
hsa:3119
hsa:4125
hsa:6367
hsa:26175
hsa:2799
hsa:51524
hsa:3055
hsa:1230
hsa:4245
hsa:83706
hsa:366
hsa:115548
hsa:4354
hsa:3689
hsa:1102
hsa:4332
hsa:54209
hsa:56833
hsa:2885
hsa:57552
hsa:1436
hsa:2760
hsa:10673
hsa:1050
hsa:58475
hsa:10870
hsa:53
hsa:54741
hsa:1536
hsa:93487
hsa:84282
hsa:10062
hsa:1234
hsa:1200
hsa:23678
hsa:51338
hsa:23313
hsa:80301
hsa:1522
hsa:11326
hsa:1389
hsa:55315
hsa:3101
hsa:84641
hsa:3071
hsa:55972
hsa:9034
hsa:53346
hsa:712
hsa:409
hsa:81501
hsa:719
hsa:146722
hsa:51192
hsa:50515
hsa:1368
hsa:64419
hsa:6646
hsa:127281
hsa:713
hsa:10859
hsa:2647
hsa:2359
hsa:4668
hsa:942
hsa:920
hsa:48
hsa:114885
hsa:9555
hsa:8741
hsa:55361
hsa:80829
hsa:140885
hsa:55803
hsa:57192
hsa:57823
hsa:26090
hsa:8942
hsa:80896
hsa:1777
hsa:2212
hsa:201266
hsa:5724
hsa:25946
hsa:51311
hsa:27044
hsa:7096
hsa:132160
hsa:50856
hsa:528
hsa:29101
hsa:51063
hsa:29992
hsa:23503
hsa:8564
hsa:126321
hsa:1497
hsa:10154
hsa:344
hsa:3903
hsa:9956
hsa:4690
hsa:116985
hsa:2182
hsa:3073
hsa:4794
hsa:100529251
hsa:2213
hsa:2209
hsa:2533
hsa:80270
hsa:4650
hsa:10288
hsa:11027
hsa:84364
hsa:22797
hsa:100526737
hsa:23312
hsa:5027
hsa:79626
hsa:55697
hsa:375387
hsa:84106
hsa:284266
hsa:10533
hsa:54968
hsa:9797
hsa:9541
hsa:4335
hsa:283050
hsa:219833
hsa:199
hsa:64174
hsa:203100
hsa:60386
hsa:80218
hsa:23659
hsa:79930
hsa:55667
hsa:9051
hsa:6009
hsa:2857
hsa:100526693
hsa:56253
hsa:126014
hsa:1857
hsa:11309
hsa:27010
hsa:84954
hsa:945
hsa:7170
hsa:79159
hsa:126364
hsa:2055
hsa:6688
hsa:23307
hsa:79836
hsa:1594
hsa:84868
hsa:81550
hsa:2054
hsa:8832
hsa:7375
hsa:4064
hsa:5435
hsa:55589
hsa:56478
hsa:9197
hsa:4145
hsa:83937
hsa:6810
hsa:8514
hsa:259307
hsa:51171
hsa:54896
hsa:1118
hsa:6916
hsa:113
hsa:84304
hsa:245972
hsa:144811
hsa:55016
hsa:55704
hsa:27036
hsa:4864
hsa:55911
hsa:3663
hsa:101928716
hsa:22944
hsa:10008
hsa:146183
hsa:654433
hsa:27180
hsa:166012
hsa:5973
hsa:220929
hsa:150372
hsa:23601
hsa:53831
hsa:4481
hsa:64581
hsa:84527
hsa:8685
hsa:1438
hsa:6614
hsa:160364
hsa:100505592
hsa:3607
hsa:64078
hsa:333929
hsa:1636
hsa:2002
hsa:58511
hsa:8740
hsa:9889
hsa:58484
hsa:1240
hsa:100506585
hsa:10607
hsa:84179
hsa:22846
hsa:6556
hsa:91647
hsa:140
hsa:399512
hsa:146547
hsa:284759
hsa:11006
hsa:11026
hsa:3687
hsa:910
hsa:10068
hsa:747
hsa:83449
hsa:84225
hsa:6819
hsa:411
hsa:26267
hsa:374868
hsa:90233
hsa:133522
hsa:3586
hsa:10990
hsa:115761
hsa:3758
hsa:130951
hsa:64072
hsa:90199
hsa:150350
hsa:101928770

## Sheet: Epithelial cell of SI
hsa:1670
hsa:7103
hsa:2168
hsa:290
hsa:2172
hsa:805
hsa:3960
hsa:1671
hsa:5967
hsa:4942
hsa:54474
hsa:229
hsa:6476
hsa:1179
hsa:2980
hsa:57016
hsa:10562
hsa:8824
hsa:5357
hsa:7851
hsa:3856
hsa:335
hsa:5320
hsa:51567
hsa:10974
hsa:345
hsa:4224
hsa:653808
hsa:51316
hsa:27290
hsa:1015
hsa:307
hsa:476
hsa:1048
hsa:5687
hsa:1811
hsa:8857
hsa:51170
hsa:27299
hsa:5948
hsa:9245
hsa:3512
hsa:6690
hsa:4583
hsa:284422
hsa:26
hsa:4922
hsa:51703
hsa:337
hsa:118471
hsa:7033
hsa:155465
hsa:521
hsa:11136
hsa:9235
hsa:11034
hsa:56667
hsa:10223
hsa:6555
hsa:2641
hsa:5105
hsa:119467
hsa:1366
hsa:7031
hsa:8972
hsa:2517
hsa:126353
hsa:1755
hsa:5968
hsa:4547
hsa:1800
hsa:79853
hsa:51527
hsa:5265
hsa:10551
hsa:120224
hsa:28959
hsa:10103
hsa:59272
hsa:130749
hsa:10924
hsa:55365
hsa:63928
hsa:5646
hsa:9056
hsa:4680
hsa:79154
hsa:9429
hsa:13
hsa:79762
hsa:873
hsa:5106
hsa:3294
hsa:9368
hsa:4640
hsa:9709
hsa:83998
hsa:22928
hsa:26996
hsa:54600
hsa:27111
hsa:5002
hsa:113452
hsa:5184
hsa:7512
hsa:57733
hsa:2981
hsa:200931
hsa:6799
hsa:140453
hsa:171586
hsa:79589
hsa:55765
hsa:401081
hsa:338
hsa:1365
hsa:5920
hsa:63924
hsa:57402
hsa:3128
hsa:27141
hsa:54825
hsa:55914
hsa:79170
hsa:2203
hsa:1803
hsa:5243
hsa:548644
hsa:29974
hsa:123264
hsa:5652
hsa:3248
hsa:154754
hsa:83661
hsa:4645
hsa:6505
hsa:55312
hsa:55630
hsa:9971
hsa:55600
hsa:51084
hsa:55808
hsa:79908
hsa:53841
hsa:6523
hsa:7534
hsa:840
hsa:1113
hsa:3957
hsa:25978
hsa:79574
hsa:65065
hsa:2877
hsa:64081
hsa:10917
hsa:8529
hsa:5408
hsa:134548
hsa:2762
hsa:64922
hsa:80736
hsa:51012
hsa:1636
hsa:1573
hsa:339
hsa:92840
hsa:93487
hsa:5284
hsa:4357
hsa:147798
hsa:1577
hsa:2647
hsa:51322
hsa:5683
hsa:23443
hsa:7366
hsa:1044
hsa:84873
hsa:91464
hsa:222171
hsa:100505989
hsa:445329
hsa:10083
hsa:54866
hsa:55620
hsa:10004
hsa:131177
hsa:196410
hsa:1373
hsa:2984
hsa:115548
hsa:387695
hsa:80829
hsa:6768
hsa:55177
hsa:6750
hsa:7367
hsa:55848
hsa:79861
hsa:5306
hsa:80117
hsa:7498
hsa:3291
hsa:340024
hsa:55018
hsa:10555
hsa:646627
hsa:1999
hsa:5794
hsa:3769
hsa:84830
hsa:51090
hsa:79654
hsa:51
hsa:1644
hsa:312
hsa:2053
hsa:93100
hsa:9032
hsa:6514
hsa:788
hsa:6398
hsa:1054
hsa:85315
hsa:50853
hsa:9926
hsa:55876
hsa:54741
hsa:2710
hsa:6359
hsa:284099
hsa:9153
hsa:84281
hsa:5595
hsa:253012
hsa:388335
hsa:4648
hsa:140738
hsa:24146
hsa:28982
hsa:80022
hsa:79799
hsa:10903
hsa:1562
hsa:3174
hsa:4478
hsa:9615
hsa:84446
hsa:2542
hsa:9963
hsa:128218
hsa:55020
hsa:634
hsa:10
hsa:84988
hsa:282679
hsa:6948
hsa:5570
hsa:55286
hsa:221545
hsa:53345
hsa:22802
hsa:90488
hsa:66002
hsa:51635
hsa:29101
hsa:80323
hsa:81932
hsa:100526737
hsa:58985
hsa:8987
hsa:23563
hsa:51128
hsa:48
hsa:85477
hsa:11148
hsa:248
hsa:29785
hsa:978
hsa:7433
hsa:90407
hsa:339977
hsa:5625
hsa:127845
hsa:5152
hsa:84152
hsa:644086
hsa:57406
hsa:100170765
hsa:7866
hsa:5009
hsa:838
hsa:3001
hsa:79838
hsa:6692
hsa:7368
hsa:2525
hsa:84647
hsa:84304
hsa:153768
hsa:200634
hsa:11046
hsa:57530
hsa:5068
hsa:3898
hsa:5435
hsa:2948
hsa:27044
hsa:1510
hsa:84879
hsa:200010
hsa:54716
hsa:79159
hsa:54979
hsa:2326
hsa:115677
hsa:388341
hsa:100526693
hsa:35
hsa:64284
hsa:64240
hsa:6370
hsa:2859
hsa:79629
hsa:7511
hsa:100289019
hsa:8876
hsa:84699
hsa:54516
hsa:291
hsa:338440
hsa:4094
hsa:6822
hsa:2110
hsa:11035
hsa:2101
hsa:222643
hsa:2524
hsa:166824
hsa:162417
hsa:377677
hsa:51066
hsa:89870
hsa:9797
hsa:8856
hsa:79098
hsa:27283
hsa:3795
hsa:23554
hsa:126295
hsa:100529251
hsa:1030
hsa:5169
hsa:149466
hsa:5331
hsa:283375
hsa:254439
hsa:6945
hsa:124975
hsa:9843
hsa:10050
hsa:137075
hsa:10331
hsa:2169
hsa:7855
hsa:10595
hsa:79767
hsa:257019
hsa:55200
hsa:726
hsa:118881
hsa:79022
hsa:135932
hsa:1559
hsa:27294
hsa:57704
hsa:6817
hsa:5801
hsa:11187
hsa:8693
hsa:8792
hsa:4486
hsa:2528
hsa:9197
hsa:54020
hsa:27134
hsa:440335
hsa:64787
hsa:54852
hsa:401546
hsa:286262
hsa:4335
hsa:23624
hsa:55715
hsa:54546
hsa:81693
hsa:57715
hsa:6532
hsa:912
hsa:54857
hsa:27237
hsa:3171
hsa:55614
hsa:83715
hsa:6366
hsa:83483
hsa:1857
hsa:10380
hsa:338094
hsa:2705
hsa:246213
hsa:1308
hsa:79152
hsa:159296
hsa:5593
hsa:80218
hsa:9058
hsa:5051
hsa:1908
hsa:165545
hsa:1259
hsa:6561
hsa:388581
hsa:5753
hsa:25803
hsa:364
hsa:7177
hsa:8645
hsa:162461
hsa:10110
hsa:91862
hsa:23607
hsa:26007
hsa:3110
hsa:113278
hsa:284723
hsa:114785
hsa:55359
hsa:23120
hsa:6518
hsa:153090
hsa:1555
hsa:9027
hsa:7113
hsa:80201
hsa:11074
hsa:346606
hsa:56478
hsa:654433
hsa:22944
hsa:283316
hsa:134285
hsa:55512
hsa:2330
hsa:1606
hsa:8399
hsa:9514
hsa:159963
hsa:55065
hsa:686
hsa:132158
hsa:10563
hsa:23035
hsa:8431
hsa:100130933
hsa:101929549
hsa:9075
hsa:151056
hsa:6356
hsa:91703
hsa:79782
hsa:80115
hsa:5326
hsa:3549
hsa:6097
hsa:56241
hsa:2494
hsa:169693
hsa:166968
hsa:3706
hsa:5651
hsa:25791
hsa:5017
hsa:27124
hsa:101928820
hsa:79784
hsa:159371
hsa:257629
hsa:23604
hsa:415117
hsa:151354
hsa:6564
hsa:118738
hsa:4888
hsa:1244
hsa:200879
hsa:100505633
hsa:79962
hsa:79849
hsa:1551
hsa:53405
hsa:474
hsa:23491
hsa:9154
hsa:1181
hsa:64816
hsa:374907
hsa:260436
hsa:130
hsa:79983
hsa:129807
hsa:10753
hsa:1776
hsa:10607
hsa:347853
hsa:11181
hsa:3284
hsa:151295
hsa:3172
hsa:10590
hsa:8989
hsa:115584
hsa:101927809
hsa:146456
hsa:100507203
hsa:150000
hsa:339479
hsa:84666
hsa:1907
hsa:140628
hsa:8435
hsa:135644
hsa:25823
hsa:4151
hsa:389332
hsa:389434
hsa:201651
hsa:51043
hsa:1364
hsa:79949
hsa:140711
hsa:253264
hsa:150135
hsa:10663
hsa:192134
hsa:53630
hsa:64241
hsa:27293
hsa:26027
hsa:733
hsa:117153
hsa:608
hsa:92211
hsa:9965
hsa:10317
hsa:285758
hsa:123355
hsa:54854
hsa:55001
hsa:266675
hsa:2671
hsa:10990
hsa:1101
hsa:6462
hsa:140803
hsa:101927934
hsa:251
hsa:3283
hsa:7432
hsa:57834
hsa:100506542
hsa:11132
hsa:100048912
hsa:90233
hsa:171389
hsa:4324
hsa:56000
hsa:3859
hsa:3352
hsa:27035
hsa:1943
hsa:139378
hsa:140893
hsa:100506125
hsa:392465
hsa:10071
hsa:1412
hsa:91828
hsa:6550
hsa:1443
